# Supplementary material for: An automatic modeling approach for the potential evaluation of CO2 geological storage in the deep saline aquifer
Source: Frontiers journal article supplement (doi:10.3389/fenrg.2022.957014), 2022-09-16
Supplement: Table_1.XLSX [file Table_1.XLSX]

## Sheet: Sheet1
Depth	Temperature	Pressure	Density
(m)	(℃)	(M Pa)	(kg/m3)
1050	71.0758	10.5987	282.499
1150	72.5688	11.6081	326.001
1250	73.2013	12.6175	371.618
1350	73.0879	13.6269	421.338
1450	73.9924	14.6363	462.696
1550	75.2015	15.6457	489.427
1650	76.5633	16.6551	509.915
1750	77.7523	17.6645	533.019
1850	79.191	18.6739	555.484
1950	80.7197	19.6833	579.455
2050	82.3143	20.6927	594.016
2150	83.8801	21.7021	604.594
2250	85.3545	22.7115	616.16
2350	86.8983	23.7209	627.852
2450	88.4074	24.7303	640.217
2550	89.9165	25.7397	648.015
2650	91.3798	26.7491	654.613
2750	92.8889	27.7585	661.415
2850	96.074	28.7679	661.34
2950	96.4558	29.7773	673.977
3050	98.0404	30.7867	678.749
3150	99.6569	31.7961	682.857
3250	101.373	32.8055	687.75
3350	103.132	33.8149	692.874
3450	104.88	34.8243	698.182
3550	106.974	35.8337	700.538
3650	110.358	36.8431	698.616
